# Supplementary material for: Antimicrobial Resistance in Enterococcus spp. Isolates from Red Foxes (Vulpes vulpes) in Latvia
Source: MDPI journal article supplement (doi:10.3390/antibiotics13020114), 2024-01-24
Supplement: s1 [file s1]

Table S1.

***Enterococcus* spp. isolates included in the present study**

| Sample code | Origin of sample - region | Origin of sample - parish | <i>Enterococcus</i> species  | No. of identified resistance | Phenotypical resistance pattern | WGS analysis (ENA accession)                                             | MLST ST (gdh, gyd, pstS, gki, aroE, xpt, yqiL for <i>E. faecialis</i> or atpA, ddl, gdh, purK, gyd, pstS, adk for <i>E. faecium</i> ) |
|-------------|---------------------------|---------------------------|------------------------------|------------------------------|---------------------------------|--------------------------------------------------------------------------|---------------------------------------------------------------------------------------------------------------------------------------|
| 423602      | Gulbenes nov              | Beļavas pag               | <i>Enterococcus faecium</i>  | 0                            | 0                               | Included (ERX11781920)                                                   | 603 (4, 2, 12, 9, 1, 7, 5)                                                                                                            |
| 429441      | Gulbenes nov              | Beļavas pag               | <i>Enterococcus faecium</i>  | 1                            | Q/D                             | Included (ERX11781937)                                                   | N (n, 3, 1, 2, 1, 1, 1)                                                                                                               |
|             | Gulbenes nov              | Beļavas pag               | <i>Enterococcus faecalis</i> | 1                            | TET                             | Included (ERX11781941)                                                   | 498 (29, 6, 30, 5, 60, 1, 4)                                                                                                          |
| 433769      | Augšdaugavas nov          | Vecsalienas pag           | <i>Enterococcus faecalis</i> | 0                            | 0                               | Included (ERX11781931)                                                   | 116 (17, 2, 22, 1, 14, 14, 1)                                                                                                         |
| 433771      | Augšdaugavas nov          | Kalupes pag               | <i>Enterococcus faecium</i>  | 1                            | TET                             | Included (ERX11781929)                                                   | 832 (60, 3, 1, 2, 2, 1, 1)                                                                                                            |
| 3802        | Rēzeknes nov              | Lendžu pag                | <i>Enterococcus faecalis</i> | 0                            | 0                               | Excluded, did not reach the threshold of >90% target genes (ERX11781911) | 482 (14, 6, 11, 45, 4, 20, 28)                                                                                                        |
| 3808        | Rēzeknes nov              | Feimaņu pag               | <i>Enterococcus faecium</i>  | 1                            | ERY                             | Included (ERX11781912)                                                   | N (n, 8, 8, 8, 11, 10, 6)                                                                                                             |
| 2124        | Alūksnes nov              | Jaunlaicenes pag          | <i>Enterococcus faecium</i>  | 0                            | 0                               | Included (ERX11781909)                                                   | N (2, 3, 1, 2, 1, n, 1)                                                                                                               |
| 17285       | Talsu nov                 | Lībagu pag                | <i>Enterococcus faecalis</i> | 0                            | 0                               | Included (ERX11781913)                                                   | 950 (99, 2, 30, 3, 21, 1, 7)                                                                                                          |
| 426383      | Ludzas nov                | Isnaudas pag              | <i>Enterococcus faecium</i>  | 1                            | TET                             | Included (ERX11781925)                                                   | 22 (2, 3, 1, 2, 1, 1, 1)                                                                                                              |
| 428642/1    | Rēzeknes nov              | Maltas pag                | <i>Enterococcus faecium</i>  | 1                            | DAP                             | Included (ERX11781932)                                                   | 32 (3, 3, 1, 2, 1, 1, 1)                                                                                                              |
| 424290      | Balvu nov                 | Šķilbēnu pag              | <i>Enterococcus faecium</i>  | 0                            | 0                               | Included (ERX11781921)                                                   | N (2, 40, 12, 3, 1, n, 1)                                                                                                             |
| 426804      | Rēzeknes nov              | Mākoņkalna pag            | <i>Enterococcus faecium</i>  | 1                            | CIP                             | Included (ERX11781926)                                                   | 29 (4, 5, 1, 3, 1, 1, 1)                                                                                                              |
| 428644      | Rēzeknes nov              | Maltas pag                | <i>Enterococcus faecium</i>  | 1                            | CIP                             | Included (ERX11781927)                                                   | 822 (4, 5, 1, 3, 1, 7, 1)                                                                                                             |

|          |                  |                  |                              |   |         |                                            |                                                      |
|----------|------------------|------------------|------------------------------|---|---------|--------------------------------------------|------------------------------------------------------|
| 427166/2 | Preiļu nov       | Galēnu pag       | <i>Enterococcus durans</i>   | 1 | TET     | Included (ERX11781922)                     | NA                                                   |
| 427167/2 | Preiļu nov       | Galēnu pag       | <i>Enterococcus faecalis</i> | 0 | 0       | Included (ERX11781939)                     | 16 (5, 1, 1, 3, 7, 7, 6)                             |
| 422861   | Rēzeknes nov     | Feimaņu pag      | <i>Enterococcus faecalis</i> | 0 | 0       | Included (ERX11781923)                     | 749 (90, 1, 18, 31, 39, 20, 88)                      |
| 23152    | Tukuma nov       | Smārdes pag      | <i>Enterococcus faecium</i>  | 1 | ERY     | Included (ERX11781918)                     | 60 (13, 8, 8, 8, 11, 10, 6)                          |
| 23065    | Ventspils        | Vārves pag       | <i>Enterococcus faecium</i>  | 0 | 0       | Included (ERX11781917)                     | 2019 (13, 13, 18, 17, 11, 19, 6)                     |
| 3829     | Rēzeknes nov     | Audriņu pag      | <i>Enterococcus faecium</i>  | 0 | 0       | Included (ERX11781915)                     | 32 (3, 3, 1, 2, 1, 1, 1)                             |
| 30266    | Ventspils nov    | Puzes pag        | <i>Enterococcus hirae</i>    | 1 | DAP     | Excluded, low coverage (<30) (ERX11781928) | NA                                                   |
| 2123     | Alūksnes nov     | Jaunlaicenes pag | <i>Enterococcus faecium</i>  | 1 | TET     | Included (ERX11781908)                     | 1863 (5, 3, 6, 6, 6, 1, 1)                           |
| 3821     | Jēkabpils nov    | Zasas pag        | <i>Enterococcus faecium</i>  | 0 | 0       | Included (ERX11781914)                     | 1045 (51, 2, 12, 9, 1, 1, 5)                         |
| 2110     | Gulbenes nov     | Galdauskas pag   | <i>Enterococcus faecalis</i> | 0 | 0       | Included (ERX11781910)                     | 1265 (12, 32, 3, 17, 6, 2, 72)                       |
| 424211/2 | Preiļu nov       | Saunas pag       | <i>Enterococcus faecium</i>  | 2 | TET-ERY | Included (ERX11781930)                     | NEW (109, 16, 8, 72, 2, 69, 15)                      |
| 424365   | Rēzeknes nov     | Feimaņu pag      | <i>Enterococcus hirae</i>    | 1 | TI      | Included (ERX11781933)                     | NA                                                   |
| 421603/1 | Augšdaugavas nov | Biķernieku pag   | <i>Enterococcus durans</i>   | 1 | TI      | Included (ERX11781934)                     | NA                                                   |
| 423118/1 | Augšdaugavas nov | Dvietes pag      | <i>Enterococcus faecalis</i> | 0 | 0       | Included (ERX11781935)                     | NEW (8, 7, 7, 5, 4, 4, 5)                            |
| 423522   | Alūksnes nov     | Jaunlaicenes pag | <i>Enterococcus durans</i>   | 0 | 0       | Included (ERX11781936)                     | NA                                                   |
| 420362   | Ludzas nov       | Ciblas pag       | <i>Enterococcus faecium</i>  | 0 | 0       | Included (ERX11781919)                     | 52 (12, 9, 6, 3, 1, 13, 1)                           |
| 418636   | Balvu nov        | Lazdukalna pag   | <i>Enterococcus faecalis</i> | 0 | 0       | Included (ERX11781916)                     | 719 (12, 32, 32, 51, 6, 20, 5)                       |
| 427166/1 | Preiļu nov       | Galēnu pag       | <i>Enterococcus faecalis</i> | 0 | 0       | Excluded, low coverage (<30) (ERX11781938) | NA, previously excluded, because of the low coverage |

|          |            |              |                              |   |   |                        |                                |
|----------|------------|--------------|------------------------------|---|---|------------------------|--------------------------------|
| 427175/3 | Preiļu nov | Saunas pag   | <i>Enterococcus faecalis</i> | 0 | 0 | Included (ERX11781940) | NEW (96, 2, 37, 1, 76, 15, 11) |
| 426073   | Balvu nov  | Šķilbēnu pag | <i>Enterococcus faecalis</i> | 0 | 0 | Included (ERX11781924) | 86 (6, 10, 11, 17, 4, 2, 1)    |

Q/D – quinupristin/dalfopristin, TET – tetracycline, ERY – erythromycin, DAP – daptomycin, CIP – ciprofloxacin, TI- tigecycline, N – no value, NA – not applicable
